# Supplementary material
Source: Royal Society of Chemistry journal article supplement (doi:10.1039/d6ma00062b)
Supplement: d6ma00062b1.pdf [file d6ma00062b1.pdf]

## Supporting Information (SI)

# Grain Structure–Controlled Growth of InSb Crystals: a Grain Boundary Engineering Approach for Enhanced Thermoelectric Performance

M. Sivakumar<sup>a</sup>, J. Prasath<sup>a</sup>, S. Senthamizh Raja<sup>a</sup>, R. Annie Victoria Rose<sup>a</sup>, J. Mani<sup>b</sup>, L.C. Chuang<sup>c</sup>, Sri Sai Samhitha Gadhavajhala<sup>d</sup>, Bhuvanesh Srinivasan<sup>d</sup>, R. Jayavel<sup>e</sup>, K. Fujiwara<sup>c</sup>, [M. Arivanandhan](#)<sup>a\*</sup>

<sup>a</sup> Centre for Nanoscience and Technology, Anna University, Chennai-600 025, Tamil Nadu, India.

<sup>b</sup>MoE Key Laboratory of Material Physics and Chemistry Under Extraordinary Conditions, School of Physical Science and Technology, Northwestern Polytechnical University, Xi'an – 710072, People's Republic of China.

<sup>c</sup>Institute for Materials Research, Tohoku University, Sendai - 980 8577, Japan.

<sup>d</sup>Department of Metallurgical and Materials Engineering, Indian Institute of Technology Madras (IIT-Madras), Chennai 600 036, Tamil Nadu, India.

<sup>e</sup>Crystal Growth Centre, Anna University, Chennai-600 025, Tamil Nadu, India.

## 1. Morphological and elemental compositional investigation of the prepared InSb Ingots.

Fig. S1 (a<sub>1</sub>-c<sub>3</sub>) shows the FESEM images of the prepared ingots SC InSb (a<sub>1</sub>-a<sub>3</sub>), AQ InSb (b<sub>1</sub>-b<sub>3</sub>), and IWQ InSb (c<sub>1</sub>-c<sub>3</sub>) samples.

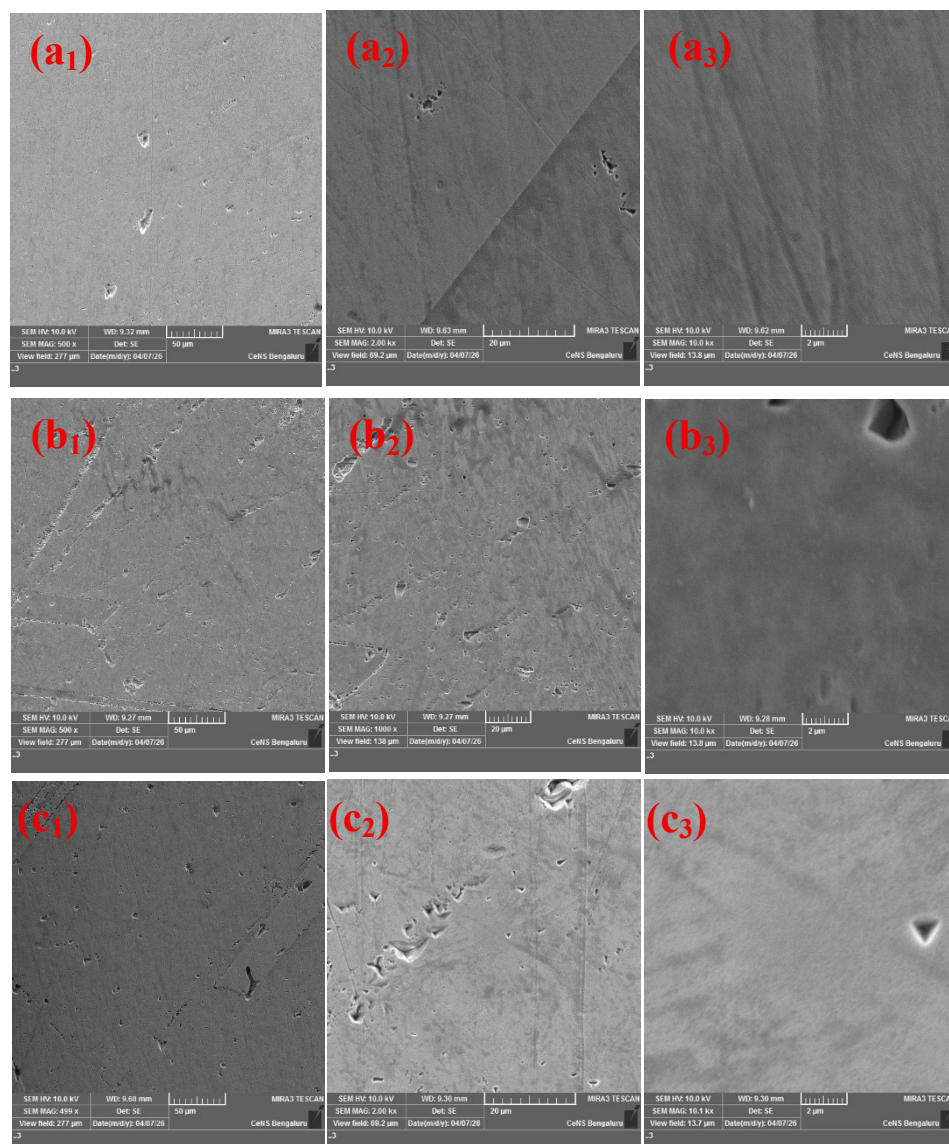

Fig. S1: FESEM pictures of SC InSb ( $a_1$ - $a_3$ ), AQ InSb ( $b_1$ - $b_3$ ), and IWQ InSb ( $c_1$ - $c_3$  polished ingots).

Fig. S2 shows the EDX analysis of SC InSb (a), AQ InSb (b), IWQ InSb (c), samples. From the EDX Spectrum the presence of In and Sb was confirmed the InSb samples. The low-level oxygen peaks related to surface oxidation of the samples. The reason for carbon peak was the double side carbon tape was used to load the samples. The elemental compositions of all the

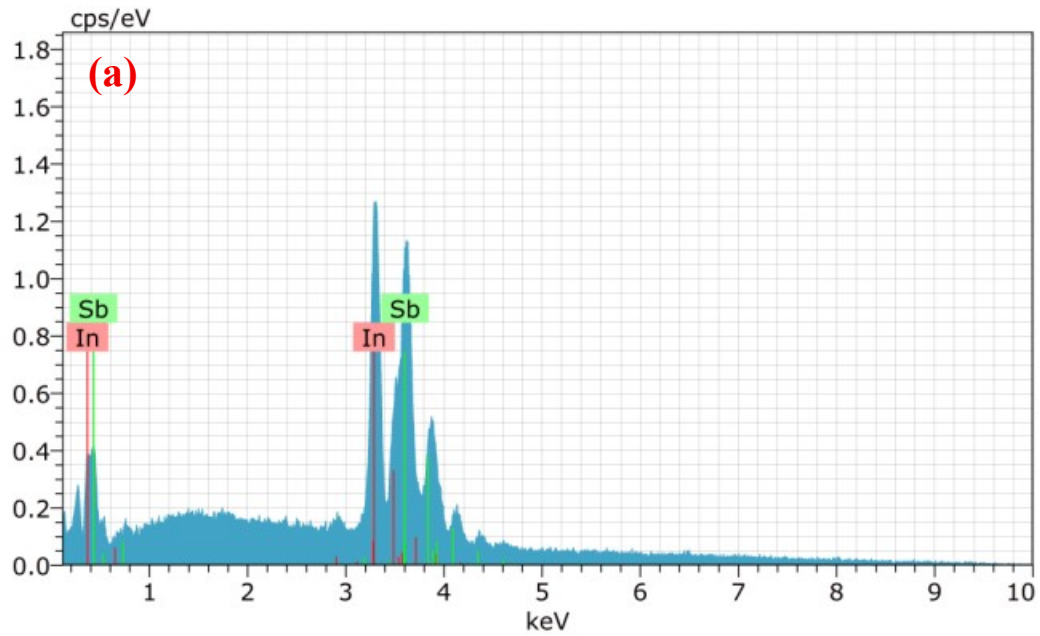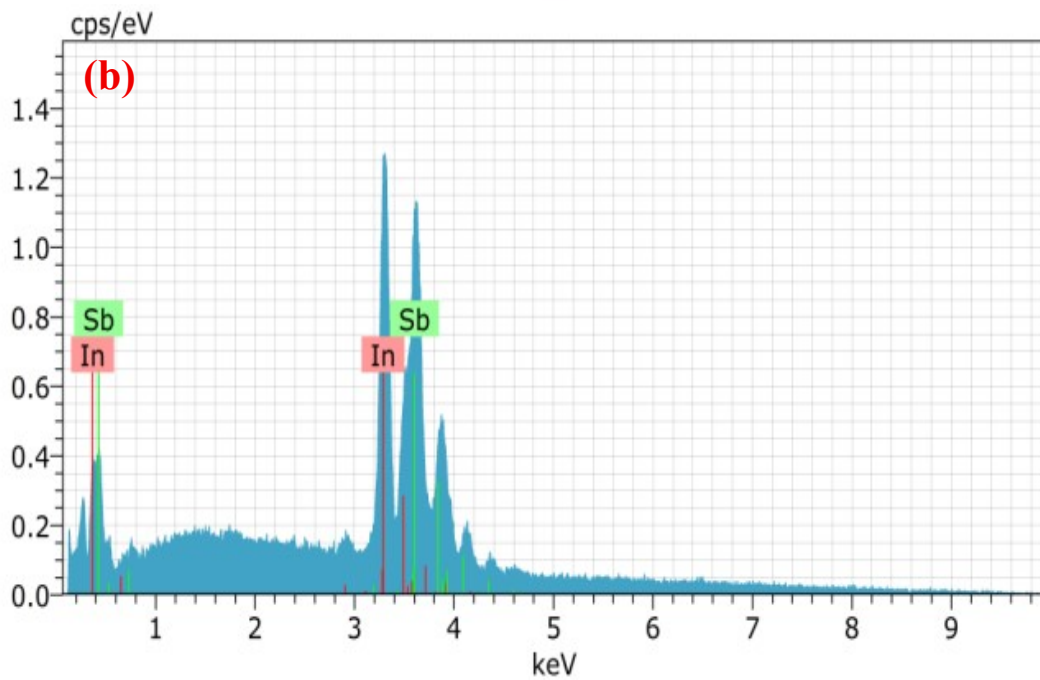

samples are revealed in Table T1.

(c)

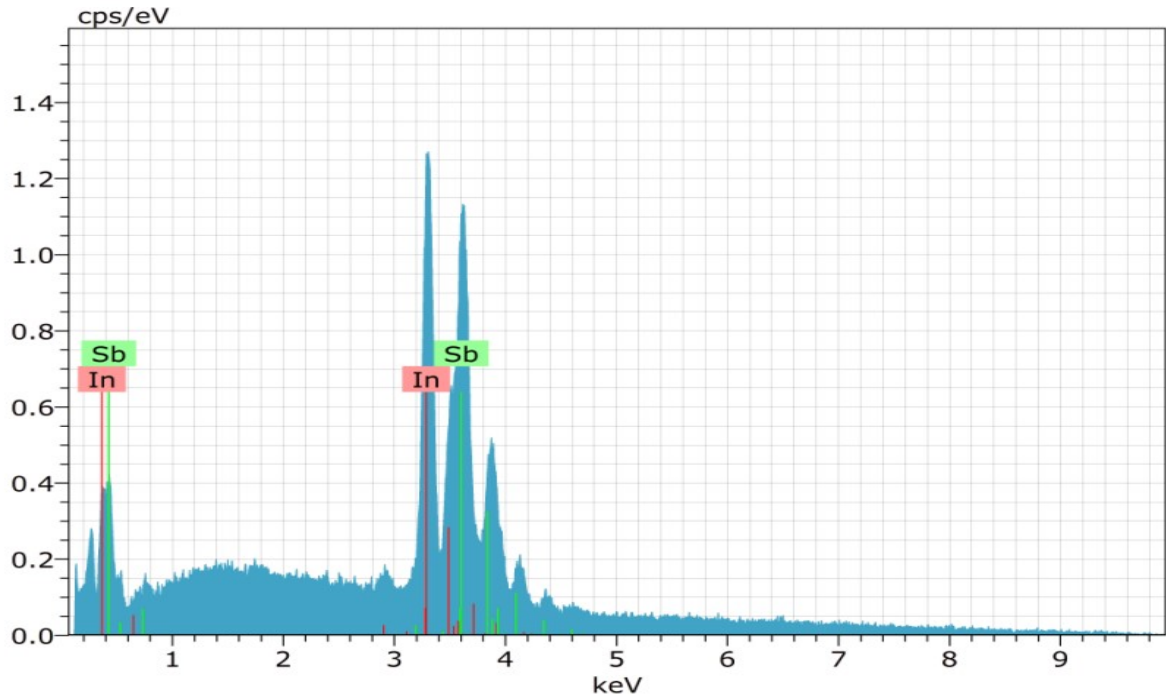

Fig. S2: EDX analysis of SC InSb (a), AQ InSb (b), IWQ InSb (c), samples.

**Table T1:** EDX - elemental compositional investigation of SC InSb (a), AQ InSb (b), IWQ InSb (c), samples.

| Sample   | Element | Weight % | Atomic % |
|----------|---------|----------|----------|
| SC InSb  | In      | 46.29    | 47.75    |
|          | Sb      | 53.71    | 52.25    |
| AQ InSb  | In      | 46.19    | 47.55    |
|          | Sb      | 53.81    | 52.45    |
| IWQ InSb | In      | 46.09    | 47.15    |
|          | Sb      | 53.91    | 52.85    |

Fig. S3 shows the FE-SEM basic elemental mapping analysis of the SC InSb ( $a_1$ - $a_3$ ), AQ InSb ( $b_1$ - $b_3$ ), and IWQ InSb ( $c_1$ - $c_3$ ) samples. The elemental mapping analysis validates the overall spreading of In and Sb elements in each InSb polycrystalline ingots.

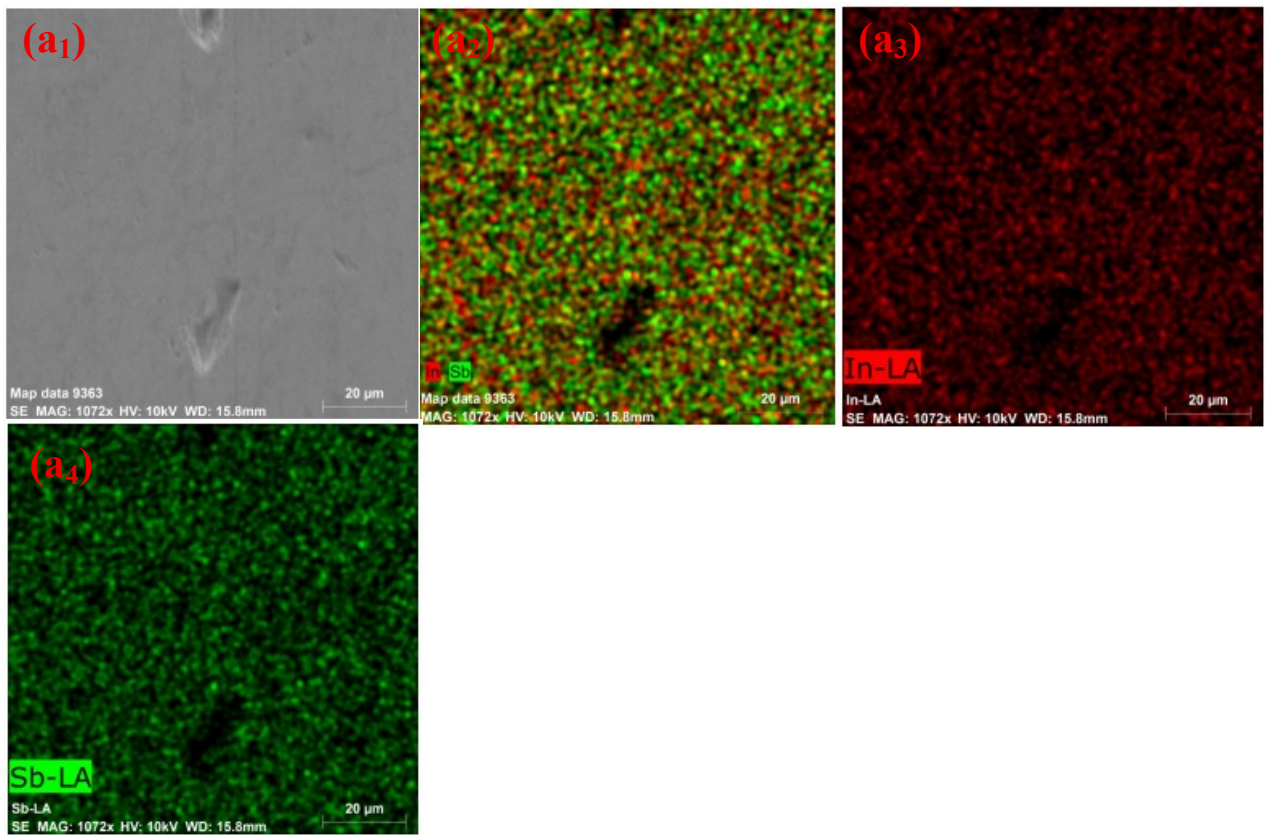

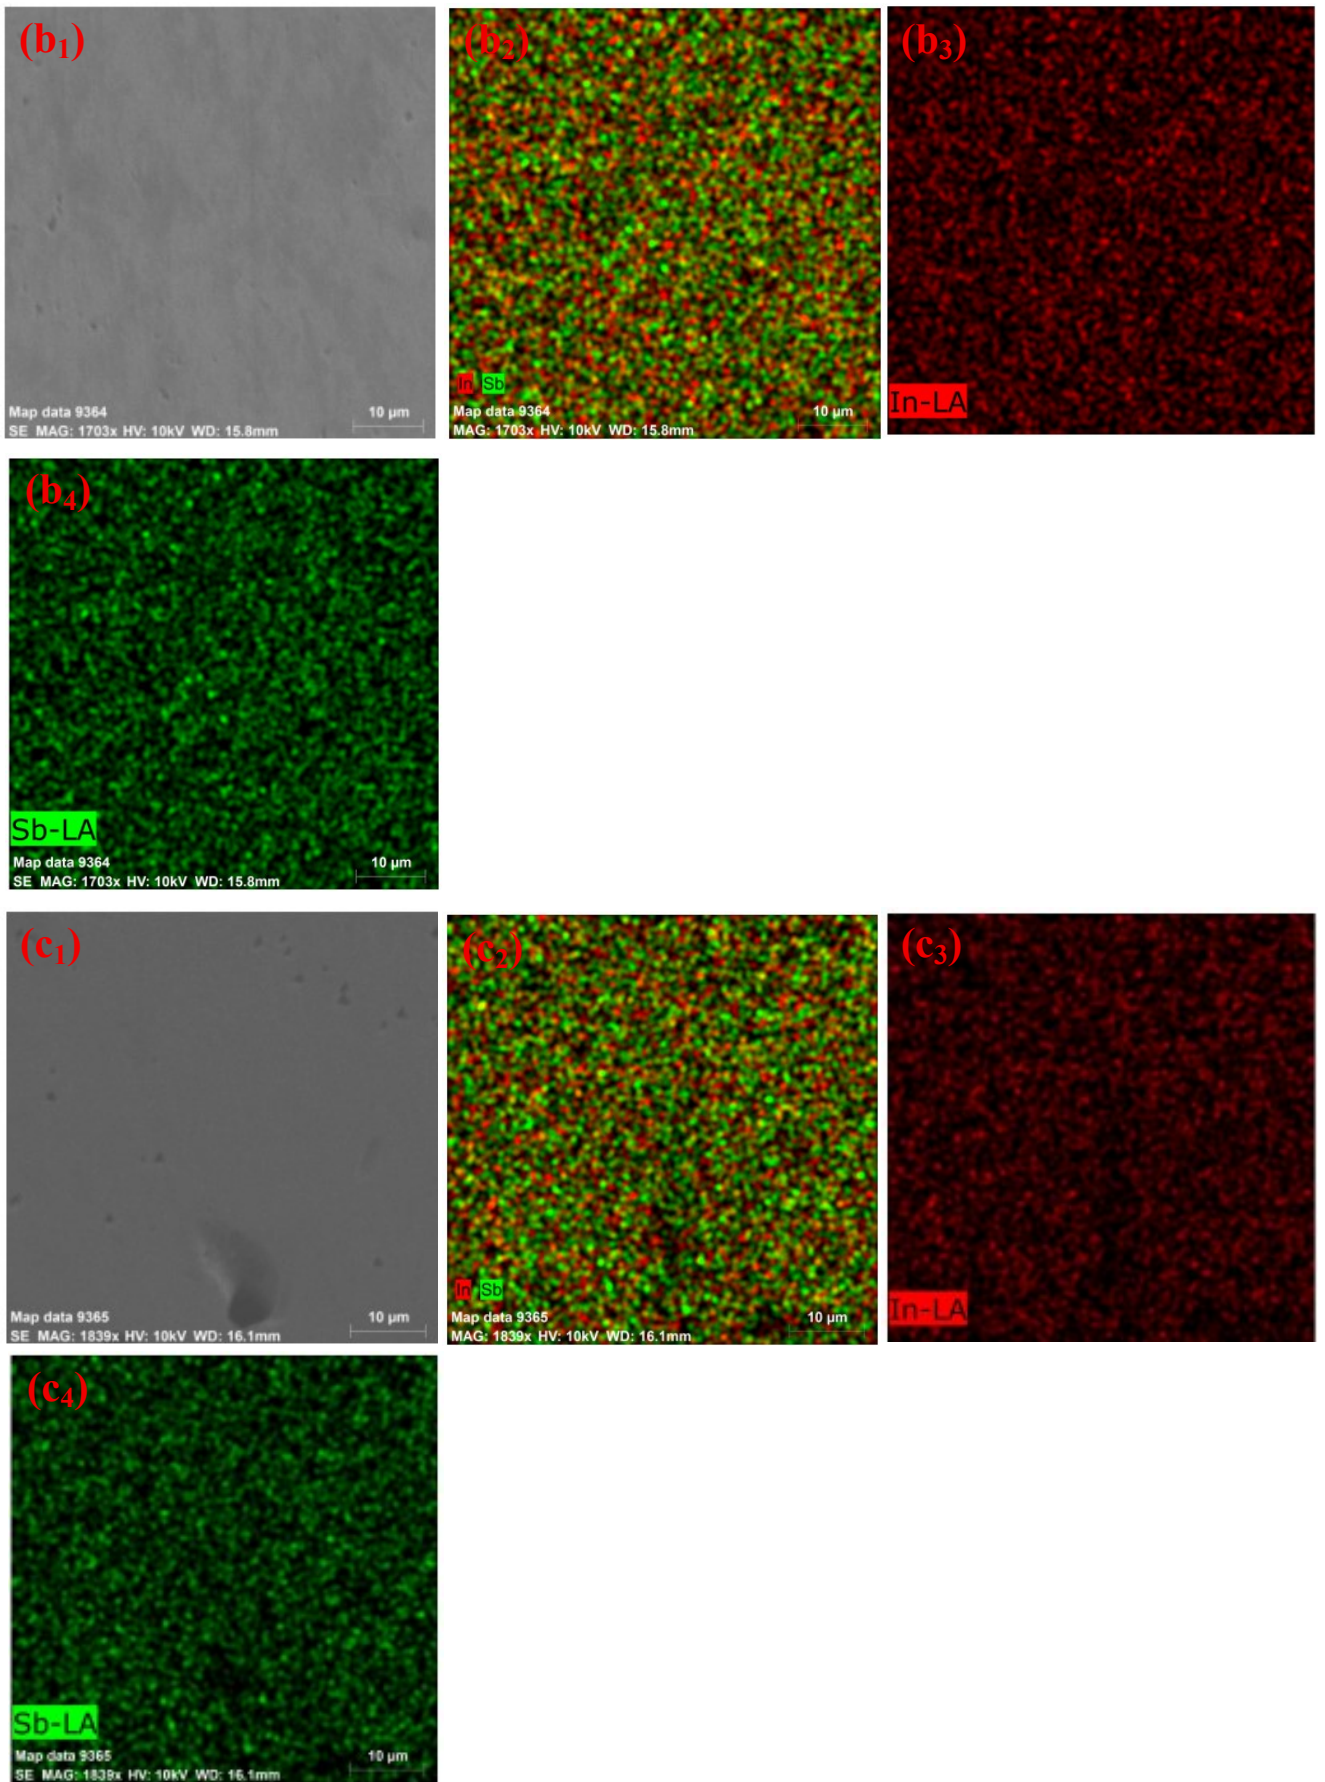

Fig. S3: FE-SEM elemental mapping analysis of the SC InSb (a<sub>1</sub>-a<sub>4</sub>) AQ InSb (b<sub>1</sub>-b<sub>4</sub>) and IWQ InSb (c<sub>1</sub>-c<sub>4</sub>).

Table S4  
boundary

(a): grain  
character

| <b>Sc InSb (Boundaries CSL)</b>                                       |                        |            |         |                      |                   |         |
|-----------------------------------------------------------------------|------------------------|------------|---------|----------------------|-------------------|---------|
| <b>Parameters</b>                                                     | <b>Centre portions</b> |            |         | <b>Edge portions</b> |                   |         |
|                                                                       | $\Sigma 3$             | $\Sigma 9$ | summary | $\Sigma 3$           | $\Sigma 9$        | summary |
| <b>Tolerance</b>                                                      | 8.66                   | 5.00       | -       | 8.66                 | 5.00              | -       |
| <b>Fraction</b>                                                       | 0.559                  | 0.263      | 0.822   | 0.987                | 0.013             | 1.000   |
| <b>volume</b>                                                         | 0.0176                 | 0.0102     | 0.0444  | 0.0176               | 0.0102            | 0.0444  |
| <b>MDF Value</b>                                                      | 31.81                  | 25.91      | 18.51   | 56.19                | 1.28              | 22.53   |
| <b>Number</b>                                                         | 1589                   | 748        | -       | 836                  | 11                | -       |
| <b>Length</b>                                                         | 2.29<br>cm             | 1.07<br>cm | -       | 1.20<br>cm           | 158.77<br>microns | -       |
| <b>Lower angle (<math>\Sigma 3, \Sigma 9</math>) grain boundaries</b> |                        |            |         |                      |                   |         |

distributions of SC InSb sample.

| <b>AQ InSb (Boundaries CSL)</b>                                                                                                          |                        |             |              |              |         |                      |            |              |                   |                   |         |
|------------------------------------------------------------------------------------------------------------------------------------------|------------------------|-------------|--------------|--------------|---------|----------------------|------------|--------------|-------------------|-------------------|---------|
| <b>Parameters</b>                                                                                                                        | <b>Centre portions</b> |             |              |              |         | <b>Edge portions</b> |            |              |                   |                   |         |
|                                                                                                                                          | $\Sigma 3$             | $\Sigma 9$  | $\Sigma 27a$ | $\Sigma 27b$ | summary | $\Sigma 3$           | $\Sigma 9$ | $\Sigma 27a$ | $\Sigma 27b$      | $\Sigma 19a$      | summary |
| <b>Tolerance</b>                                                                                                                         | <b>8.66</b>            | <b>5.00</b> | <b>2.89</b>  | <b>2.89</b>  | -       | 8.66                 | 5.00       | 2.89         | 2.89              | 3.44              | -       |
| <b>Fraction</b>                                                                                                                          | 0.582                  | 0.108       | 0.059        | 0.041        | 0.789   | 0.374                | 0.105      | 0.119        | 0.004             | 0.002             | 0.604   |
| <b>volume</b>                                                                                                                            | 0.0176                 | 0.0102      | 0.0020       | 0.0039       | 0.0444  | 0.0176               | 0.0102     | 0.0020       | 0.0039            | 0.0022            | 0.0444  |
| <b>MDF Value</b>                                                                                                                         | 33.15                  | 10.59       | 30.07        | 10.40        | 17.78   | 21.28                | 10.39      | 60.79        | 1.06              | 0.55              | 13.61   |
| <b>Number</b>                                                                                                                            | 2795                   | 516         | 282          | 195          | -       | 1630                 | 460        | 518          | 18                | 8                 | -       |
| <b>Length</b>                                                                                                                            | 4.03<br>cm             | 7.44<br>mm  | 4.07<br>mm   | 2.81<br>mm   | -       | 2.35<br>cm           | 6.63<br>mm | 7.47<br>mm   | 259.80<br>microns | 115.47<br>microns | -       |
| <b>Lower angle (<math>\Sigma 3, \Sigma 9</math>) and Higher angle (<math>\Sigma 27a, \Sigma 27b, \Sigma 19a</math>) grain boundaries</b> |                        |             |              |              |         |                      |            |              |                   |                   |         |

Table S4 (b): grain boundary character distributions of AQ InSb sample.

Table S4 (c): grain boundary character distributions of IWQ InSb sample.

**IWQ InSb (Boundaries CSL)**

| Parameters       | Centre portions |            |              |              |              |                   |         | Edge portions |             |              |              |                   |         |
|------------------|-----------------|------------|--------------|--------------|--------------|-------------------|---------|---------------|-------------|--------------|--------------|-------------------|---------|
|                  | $\Sigma 3$      | $\Sigma 9$ | $\Sigma 27a$ | $\Sigma 27b$ | $\Sigma 35b$ | $\Sigma 19b$      | summary | $\Sigma 3$    | $\Sigma 9$  | $\Sigma 27a$ | $\Sigma 27b$ | $\Sigma 19a$      | summary |
| <b>Tolerance</b> | 8.66            | 5.00       | 2.89         | 2.89         | 2.54         | 3.44              | -       | 8.66          | 5.00        | 2.89         | 2.89         | 3.44              | -       |
| <b>Fraction</b>  | 0.531           | 0.077      | 0.038        | 0.019        | 0.005        | 0005              | 0.675   | 0.564         | 0.099       | 0.045        | 0.032        | 0.001             | 0.742   |
| <b>volume</b>    | 0.0176          | 0.0102     | 0.0020       | 0.0039       | 0.0026       | 0.0022            | 0.0444  | 0.0176        | 0.0102      | 0.0020       | 0.0039       | 0.0033            | 0.0444  |
| <b>MDF Value</b> | 30.25           | 7.59       | 19.27        | 4.95         | 1.79         | 2.10              | 15.21   | 32.12         | 9.75        | 22.86        | 8.20         | 0.44              | 16.71   |
| <b>Number</b>    | 5957            | 863        | 422          | 217          | 53           | 52                | -       | 8932          | 1566        | 707          | 507          | 23                | -       |
| <b>Length</b>    | 8.59<br>cm      | 1.24<br>cm | 6.09<br>mm   | 3.13<br>mm   | 764.98<br>mm | 750.55<br>microns | -       | 12.89<br>cm   | 2.260<br>cm | 1.02<br>cm   | 7.31<br>mm   | 331.97<br>microns | -       |

**Lower angle ( $\Sigma 3, \Sigma 9$ ) and Higher angle ( $\Sigma 27a, \Sigma 27b, \Sigma 35b, \Sigma 19b$ ) grain boundaries**
